1 The pitfalls of inferring virus-virus interactions from co-detection  
2 prevalence data: Application to influenza and SARS-CoV-2

3 Matthieu Domenech de Cellès<sup>1,\*</sup>, Elizabeth Goult<sup>1</sup>,  
4 Jean-Sébastien Casalegno<sup>2,3</sup>, Sarah Kramer<sup>1</sup>

4 1. Max Planck Institute for Infection Biology, Infectious Disease Epidemiology group, Charitéplatz 1,  
5 Campus Charité Mitte, 10117 Berlin, Germany

6 2. Laboratoire de Virologie des HCL, IAI, CNR des virus à transmission respiratoire (dont la grippe)  
7 Hôpital de la Croix-Rousse F-69317 Lyon cedex 04, France

8 3. Virpath, Centre International de Recherche en Infectiologie (CIRI), Université de Lyon Inserm U1111,  
9 CNRS UMR 5308, ENS de Lyon, UCBL F-69372 Lyon cedex 08, France

10 **\*Corresponding author:** Dr. Matthieu Domenech de Cellès, Max Planck Institute for Infection Bi-  
11 ology, Charitéplatz 1, Campus Charité Mitte, 10117 Berlin, Germany. E-mail address: domenech@mpiib-  
12 berlin.mpg.de

13 **Keywords** SARS-CoV-2; COVID-19; influenza; virus-virus interaction; mathematical modeling

14

## Abstract

15

16

17

18

19

20

21

22

23

24

25

26

27

28

29

There is growing experimental evidence that many respiratory viruses—including influenza and SARS-CoV-2—can interact, such that their epidemiological dynamics may not be independent. To assess these interactions, standard statistical tests of independence suggest that the prevalence ratio—defined as the ratio of co-infection prevalence to the product of single-infection prevalences—should equal unity for non-interacting pathogens. As a result, earlier epidemiological studies aimed to estimate the prevalence ratio from co-detection prevalence data, under the assumption that deviations from unity implied interaction. To examine the validity of this assumption, we designed a simulation study that built on a broadly applicable epidemiological model of co-circulation of two respiratory viruses causing seasonal epidemics. By focusing on the pair influenza–SARS-CoV-2, we first demonstrate that the prevalence ratio systematically under-estimates the strength of interaction, and can even misclassify antagonistic or synergistic interactions that persist after clearance of infection. In a global sensitivity analysis, we further identify properties of viral infection—such as a high reproduction number or a short infectious period—that blur the interaction inferred from the prevalence ratio. Altogether, our results suggest that epidemiological studies based on co-detection prevalence data provide a poor guide to assess interactions among respiratory viruses.

## 30 Main Text

### 31 Introduction

32 The pandemic of coronavirus disease 2019 (COVID-19), caused by the novel severe acute respiratory syn-  
33 drome coronavirus 2 (SARS-CoV-2), has emphasized the persistent threat posed by respiratory viruses. In  
34 addition to SARS-CoV-2, other major respiratory viruses like influenza and the respiratory syncytial virus  
35 (RSV) cause a substantial burden every year, estimated at 78 million cases of lower respiratory infections and  
36 130,000 associated deaths worldwide in 2016 [1]. As evidenced by the current and past pandemics, the large  
37 host range of respiratory viruses—and the correspondingly high risk of spillover from animals into humans—  
38 also makes them prime candidates for emergence of currently unknown “diseases X” [2]. Interaction—here  
39 broadly defined as the ability of one pathogen to affect infection or disease caused by another pathogen—is  
40 an intriguing yet under-studied aspect of respiratory viruses’ biology [3]. Although different nomenclatures  
41 have been proposed [4], such interactions can be classified according to their sign, either positive (synony-  
42 mously, synergistic or facilitatory) or negative (synonymously, antagonistic or competitive). According to  
43 experimental evidence, various biological mechanisms exist which make either sign *a priori* plausible [4]. Ex-  
44 amples include, in the case of positive interactions, up-regulation of viral target receptors [5] or cell fusion [6];  
45 and, in the case of negative interactions, blocking of viral replication caused by the interferon response [7, 8].  
46 Intriguingly, different respiratory viruses may have opposing effects on COVID-19, *e.g.*, rhinoviruses can  
47 inhibit SARS-CoV-2 infection via the interferon response [8], while influenza A viruses can facilitate it via up-  
48 regulation of ACE2, the cognate receptor of SARS-CoV-2 in human cells [5, 9, 10]. SARS-CoV-2 interactions  
49 may have far-reaching implications for predicting not only the future course of the COVID-19 pandemic, but  
50 also the indirect effects of non-COVID-19 vaccines on COVID-19 [11]. Indeed, vaccines that directly target a  
51 pathogen may also indirectly affect non-target pathogens that interact with this target pathogen [12, 13, 14].

52 Because of their relevance to epidemiology and public health, a natural question is how best to identify  
53 and estimate interactions between respiratory viruses. Arguably, challenge studies in animals or humans  
54 provide the strongest form of evidence, because they can pinpoint the within-host mechanisms of interaction  
55 in a controlled experimental setting. However, such studies remain scarce and, more generally, it is not  
56 easy to predict their consequences at the scale of human populations [15]. Hence, epidemiological studies—  
57 ideally informed by experimental evidence to narrow the search range of interacting pathogens—remain  
58 indispensable to assess interactions, but it is unclear whether methods commonly used in such studies are  
59 well-suited to this task.

60 In particular, recent studies of SARS-CoV-2 interactions used a test-negative design [16] to compare

61 the risk of SARS-CoV-2 infection among those infected with another respiratory virus (*e.g.*, influenza) to  
62 that among those uninfected [17, 18, 19]. The underlying idea is conceptually simple: if two (or more)  
63 viruses do not interact and circulate independently, then the frequency of co-detection estimated from cross-  
64 sectional data should be approximately equal to the product of each virus’s detection frequency—conversely,  
65 any significant deviation from equality should indicate interaction. However, earlier epidemiological and  
66 ecological modeling studies have cautioned against seemingly intuitive metrics of interaction [15, 20, 21]. In  
67 fact, to our knowledge the validity of this study design has not yet been systematically tested for respiratory  
68 viruses that cause seasonal epidemics.

69 In this study, we aimed to determine if epidemiological studies based on co-detection prevalence data  
70 enabled reliable estimation of interactions between respiratory viruses. To do so, we designed a simulation  
71 study that built on a general epidemiological model of co-circulation of two respiratory viruses. We show  
72 that cross-sectional estimates of co-infection prevalence—interpreted either alone or in combination with  
73 estimates of single-infection prevalences—provide a poor guide to assess interaction. Hence, we argue that  
74 earlier epidemiological studies based on this design should be interpreted with caution and that further  
75 longitudinal studies will be needed to elucidate the epidemiological interactions of SARS-CoV-2 with other  
76 respiratory viruses.

## 77 Methods

78 **Transmission model of viral co-circulation** We developed a deterministic model of circulation of  
79 two respiratory viruses, assumed to interact during the infectious period (*i.e.*, the period of transmissible  
80 viral infection, denoted by  $I$ ) or during a transient period following clearance of infection (denoted by  $T$ ).  
81 According to experimental evidence, such interactions can result from an antiviral state caused by non-  
82 specific innate immune responses (such as the interferon response), which develop early during infection  
83 and can persist for a short period after clearance of infection [7]. In contrast, we did not model long-term  
84 interactions (effected, for example, by adaptive cross-immunity), which are less likely for different species of  
85 respiratory viruses [7]. The model was similar to that originally proposed by Shrestha *et al.* [15], with the  
86 addition of a latent period (denoted by  $E$ ) and of a realistic distribution for the infectious period, modeled  
87 as a Gamma distribution with shape parameter 2 [22]. The transmission dynamic of each virus was therefore  
88 represented by an SEITR model [23], where  $S$  represents susceptible individuals and  $R$  recovered individuals.  
89 Following Shrestha *et al.*, we used a double index notation to indicate the infection status with respect to  
90 each virus, *e.g.*,  $X_{SE}$  represents the proportion of individuals susceptible to virus 1 and exposed to virus 2.  
91 As we primarily focused on respiratory viruses that cause seasonal epidemics lasting a few months, we made

92 the reasonable assumption of a constant, closed population.

93 The model was defined by a set of  $6 \times 6 = 36$  ordinary differential equations, represented schematically  
94 in Fig. 1. The force of infection of each virus  $i = \{1, 2\}$  was given by:

$$\begin{aligned}\lambda_1(t) &= R_1 \gamma_1 p_1(t) \\ p_1(t) &= \sum_{x \in \Xi} [X_{I_a x}(t) + X_{I_b x}(t)] \\ \lambda_2(t) &= R_2 \gamma_2 p_2(t) \\ p_2(t) &= \sum_{x \in \Xi} [X_{x I_a}(t) + X_{x I_b}(t)]\end{aligned}$$

95 where  $\Xi = \{S, E, I_a, I_b, T, R\}$  is the set of state variables,  $R_i$  is the reproduction number of virus  $i$ ,  $1/\gamma_i$  the  
96 average infectious period of virus  $i$ , and  $p_i(t)$  the prevalence of infection with virus  $i$ . Importantly, as in [24] we  
97 assumed that  $R_i$  captured pre-existing population immunity. Hence, this parameter is best interpreted here  
98 as the initial reproduction number in a partially immune population, as opposed to the basic reproduction  
99 number in a fully susceptible population [24]. We also defined the prevalence of individuals co-infected  
100 (purple compartments in Fig. 1):

$$p_{12}(t) = X_{I_a I_a}(t) + X_{I_a I_b}(t) + X_{I_b I_a}(t) + X_{I_b I_b}(t)$$

101 **Metric to infer interaction from co-detection prevalence data** Standard statistical tests of inde-  
102 pendence suggest that the following prevalence ratio (PR):

$$\text{PR}(t) = \frac{p_{12}(t)}{p_1(t) \times p_2(t)}$$

103 could be used to infer interaction [18, 17, 19]. Intuitively, a prevalence ratio above unity indicates that the  
104 frequency of co-detection is higher than that expected by chance, suggesting that co-infection is facilitated—  
105 that is, that the interaction is positive, *i.e.*, synergistic [20, 21]. Correspondingly, a prevalence ratio below  
106 unity would suggest a negative, or antagonistic interaction. In numerical applications, we calculated the  
107 prevalence ratio at the time of peak co-infection prevalence,  $t_{\max} = \arg \max_t p_{12}(t)$  (cf. Fig. 2), as we  
108 reasoned that empirical studies would have maximal statistical power to detect co-infection at that time  
109 point. Nevertheless, this choice is arbitrary, and we considered an alternative calculation in a sensitivity  
110 analysis, described below. In the following, we drop the time argument ( $\text{PR} = \text{PR}(t_{\max})$ ) and we simply  
111 refer to the prevalence ratio calculated at that time point.

112 Of note, other definitions of the prevalence ratio are possible and have been used in previous studies.

113 For example, earlier studies of the association between SARS-CoV-2 and influenza compared the fraction  
114 of individuals infected with virus 2 among those infected with virus 1 to the fraction infected with virus 2  
115 among those uninfected with virus 1—that is, a test negative design [18, 17, 19]. Using the above notations  
116 and after some algebra, the corresponding prevalence ratio  $PR'$  equals:

$$PR' = \frac{\frac{p_{12}}{p_1}}{\frac{p_2 - p_{12}}{1 - p_1}} = PR \frac{1 - p_1}{1 - PR \times p_1}$$

117 However, this alternative prevalence ratio is no longer symmetric in virus 1 and 2, which implies an arbitrary  
118 choice of virus 1. We therefore prefer our formulation, but we point out that the two prevalence ratios  
119 are approximately equal for low prevalence of infection with virus 1. Furthermore, it can be shown that  
120  $PR' \geq 1 \iff PR \geq 1$ , such that the sign of the interaction inferred from either ratio is identical.

121 **Model parametrization** In numerical applications, we considered the pair influenza (virus 1)–SARS-  
122 CoV-2 (virus 2) and we fixed the parameters accordingly (Table 1). Specifically, for influenza we assumed an  
123 average latent period of 1 day and an average infectious period of 4 days, resulting in an average generation  
124 time of 3 days [25, 26]. For SARS-CoV-2, we assumed an average latent period of 4 days and an average  
125 infectious period of 5 days (average generation time of 6.5 days) [27, 28, 29]. The reproduction number of  
126 influenza was fixed to 1.3 [24] and that of SARS-CoV-2 to 2.5 [28, 30]. To initialize the model, we assumed  
127 that a small fraction  $X_{ES}(0) = E_{0,1} = 10^{-3}$  had been exposed to influenza and  $X_{SE}(0) = E_{0,2} = 10^{-5}$  to  
128 SARS-CoV-2. These initial conditions were chosen to reflect the epidemiological situation in early 2020 in  
129 Europe, where influenza was already circulating before the emergence of SARS-CoV-2 [31]. Other individuals  
130 were assumed fully susceptible ( $X_{SS}(0) = 1 - E_{0,1} - E_{0,2}$ ), and all other compartments were initialized to  
131 0. As explained above, the initial reproduction number  $R_i$  was supposed to capture pre-existing population  
132 immunity [24]. For simplicity we considered only symmetric interactions, that is, the effect of virus 1 on  
133 virus 2 was assumed equal to that of virus 2 on virus 1. Furthermore, we assumed that interaction could not  
134 change sign over the course of infection, and we therefore tested negative ( $0 \leq \theta^{(T)}, \theta^{(I)} \leq 1$ ) and positive  
135 ( $1 \leq \theta^{(T)}, \theta^{(I)} \leq 5$ ) interactions separately.

136 **Simulation protocol** In all scenarios, the model was integrated numerically for a period of 400 days, with  
137 state variable values recorded every  $5 \times 10^{-2}$  days.

138 **Sensitivity analyses for influenza and SARS-CoV-2** To verify the robustness of our results, we  
139 conducted two sensitivity analyses. First, we considered an alternative prevalence ratio, similarly defined but  
140 averaged  $\pm 14$  days around the time of peak co-infection prevalence. Second, although earlier experimental

141 studies found that influenza can affect SARS-CoV-2 infection [9, 10, 5], the effect of SARS-CoV-2 on influenza  
142 infection, if any, is currently unknown. Previous experimental studies—*e.g.*, of influenza and RSV [7]—  
143 demonstrated the possibility of non-symmetric interactions, where one virus affects the other, but not the  
144 other way around. We therefore tested an alternative hypothesis of non-symmetric interactions, for which  
145 influenza affected SARS-CoV-2 infection, while SARS-CoV-2 did not affect influenza infection ( $\theta_2^{(I)} = \theta_2^{(T)} =$   
146 1).

147 **Global sensitivity analyses** To examine more generally the properties of viral infection and interaction  
148 that affected the prevalence ratio, we conducted a global sensitivity analysis for a broad range of respiratory  
149 viruses [32]. For simplicity, we assumed a fully symmetric model with identical characteristics of the two  
150 viruses, and we then proceeded in three steps. First, we used a Latin hypercube design to sample  $10^3$   
151 values (over the ranges indicated in Table 1, [33]) of the following five parameters: average latent period  
152 ( $1/\sigma$ ), average infectious period ( $1/\gamma$ ), average post-infectious period ( $1/\delta$ ), degree of interaction during  
153 the infectious period ( $\theta^{(I)}$ ), and degree of interaction during the post-infectious period ( $\theta^{(T)}$ ). Second,  
154 we simulated the model and calculated the prevalence ratio for every parameter set. Finally, we used a  
155 Normal generalized additive regression model (GAM) to simultaneously estimate the association between  
156 the prevalence ratio and every input parameter [34]. For every parameter, the association was modeled  
157 using a basis of cubic splines, with a maximum basis dimension of 10. Preliminary analyses indicated that  
158 the prevalence ratio was sensitive to the reproduction number, in isolation and in interaction with other  
159 parameters. To simplify the regression model, we therefore ran the global sensitivity analysis for three  
160 different values of the reproduction number (1.5, 2.0, and 2.5).

161 **Numerical implementation** We implemented and simulated all the models using the `pomp` package [35]  
162 in R version 3.6.3 [36]. For the global sensitivity analysis, we used the `mgcv` package [34] to fit the GAMs and  
163 the `ggeffects` package [37] to plot the marginal effect of each input parameter. Finally, we used the `renv`  
164 package to keep track of all packages' version and to increase the results' reproducibility [38].

## 165 Results

### 166 The prevalence ratio correctly identifies the sign, but not the degree, of uniform interactions

167 We first considered interactions of equal strength during the infectious and post-infectious periods ( $\theta =$   
168  $\theta^{(I)} = \theta^{(T)}$ )—henceforth referred to as *uniform* interactions. Example simulations of negative, neutral,  
169 and positive interactions between influenza and SARS-CoV-2 are plotted in Fig. 2. Compared with the

170 no-interaction scenario (peak co-infection prevalence: 0.4%), the peak amplitude of co-infection was lower  
171 for negative interaction (0.1%) and higher for positive interaction (2.8%). In all scenarios, however, the  
172 peak time was approximately identical. Next, we examined the general relationship between the strength  
173 of interaction and the prevalence ratio for different values of the post-infectious period in the range 1–14  
174 days (Fig. 3). We found that the prevalence ratio equalled 1 for non-interacting viruses and thus permitted  
175 correct identification of neutral interactions ( $\theta = 1$ ). For interacting viruses ( $\theta \neq 1$ ), the prevalence ratio  
176 also correctly estimated the sign of the interaction, but systematically under-estimated its strength. Because  
177 of a concave association, under-estimation became more severe as the strength of interaction increased.  
178 The degree of under-estimation also increased with the duration of the post-infectious period. Hence, we  
179 found evidence that the prevalence ratio enabled qualitative, but not quantitative, estimation of uniform  
180 interactions.

181 **Higher interaction post-infection can cause the prevalence ratio to misidentify non-uniform**  
182 **interactions** Next, we considered the more general case of interactions that differed during the infectious  
183 and the post-infectious periods, or *non-uniform* interactions ( $\theta^{(I)} \neq \theta^{(T)}$ ). For these experiments, we  
184 assumed an average post-infectious period of 7 days and we tested negative ( $0 \leq \theta^{(I)}, \theta^{(T)} \leq 1$ ) and positive  
185 ( $1 \leq \theta^{(I)}, \theta^{(T)} \leq 5$ ) interactions separately. Because higher values of  $\theta$  actually resulted in lower interaction  
186 when the true interaction was assumed negative, in the following we define the strength of interaction as  
187  $1 - \theta$  for negative interactions and as  $\theta$  for positive interactions during either the infectious or the post-  
188 infectious period. As shown in Fig. 4, we found that the prevalence ratio was a monotonic function of the  
189 strength of interaction during the infectious period, either decreasing for negative interactions or increasing  
190 for positive interactions. Hence, in either case stronger interaction during the infectious period helped the  
191 prevalence ratio identify the true interaction. In contrast, higher interaction during the post-infectious  
192 period blurred the interaction inferred from the prevalence ratio. For weak interaction during infection  
193 ( $0.8 \leq \theta^{(I)} \leq 1.75$ ), these two opposing effects combined caused the prevalence ratio to misidentify the sign  
194 of interaction in scenarios with strong interaction post-infection. In the other scenarios, the prevalence ratio  
195 correctly identified the sign of the interaction, but substantially under-estimated its strength (*e.g.*, prevalence  
196 ratio of 0.44 for  $\theta^{(I)} = 0$  and  $\theta^{(T)} = 1$ , of 1.82 for  $\theta^{(I)} = 5$  and  $\theta^{(T)} = 1$ ). These experiments demonstrate  
197 that the prevalence ratio is an unreliable measure of interaction between influenza and SARS-CoV-2.

198 **Sensitivity analyses demonstrate the results' robustness for influenza and SARS-CoV-2** In  
199 sensitivity analyses, we first verified that our results were robust to an alternative calculation of the prevalence  
200 ratio (Fig. S1). Second, we repeated our analyses for non-symmetric interactions with no effect of SARS-CoV-



201 2 on influenza infection (Fig. S2). The results were broadly comparable to those for symmetric interactions  
202 (Fig. 4), except that fewer parameter combinations caused the prevalence ratio to mis-identify the sign of  
203 interaction. However, the strength of interaction was also more severely under-estimated in this scenario  
204 (prevalence ratio range: 0.80–1.41, compared with 0.44–1.82 for symmetric interactions).

205 **Global sensitivity analysis highlights properties of viral infection that obscure or facilitate**  
206 **estimation of interaction** In a global sensitivity analysis of positive interactions ( $\theta^{(I)}, \theta^{(T)} \geq 1$ ), we  
207 assessed how different properties of viral infection and interaction affected the prevalence ratio. As shown  
208 in Fig. 5, the prevalence ratio decreased with the average latent period, the average post-infectious period,  
209 and the strength of interaction post-infection. Hence, these three parameters blurred the interaction inferred  
210 from the prevalence ratio. Conversely, the average length of, and the strength of interaction during, the  
211 infectious period increased with the prevalence ratio and therefore facilitated estimation of the interaction.  
212 Of note, higher values of the reproduction number dampened all these variations. To understand the effect of  
213 each parameter on the prevalence ratio, we propose that some insights can be gained by examining how and  
214 when each parameter affects the prevalences of single infections and co-infection. For example, it is likely  
215 that parameters that enhance interaction after infection (*i.e.*, higher  $\theta^{(T)}$  and  $1/\delta$ ) affect single-infection  
216 prevalences more rapidly and strongly than co-infection prevalence, thereby decreasing the prevalence ratio.  
217 In sum, these results confirm our earlier experiments on influenza and SARS-CoV-2 and highlight additional  
218 factors that make it difficult to interpret the prevalence ratio as a measure of interactions between respiratory  
219 viruses.

## 220 Discussion

221 In this study, we aimed to determine if the prevalence ratio—defined as the ratio of the prevalence of  
222 co-infection to the product of individual infection prevalences—enabled reliable estimation of interactions  
223 between respiratory viruses. To do so we designed a simulation study that built on a broadly applicable  
224 epidemiological model of co-circulation of two respiratory viruses. By focusing on the pair influenza–SARS-  
225 CoV-2, we first demonstrated that the prevalence ratio systematically under-estimated the strength of in-  
226 teraction, and could even mistake the sign of interactions that persisted after clearance of infection. In a  
227 global sensitivity analysis, we further identified properties of viral infection—such as a high reproduction  
228 number, a long latent period, or a short infectious period—that blurred the interaction inferred from the  
229 prevalence ratio. Our results show that, in the absence of precise information about the timing of interaction,  
230 epidemiological studies designed to estimate the prevalence ratio, or variations thereof, may be unreliable.

231 With the likely prospect of COVID-19 becoming endemic, there is a pressing need to elucidate the po-  
232 tential interactions of SARS-CoV-2 with other pathogens, in particular respiratory viruses. Thus far, most  
233 epidemiological studies of SARS-CoV-2 interaction used simple statistics of co-circulation, such as the preva-  
234 lence of co-infection, the prevalence ratio, or some variation thereof [18, 17, 19, 39, 40]. As we showed  
235 here, however, such studies—even those carefully designed to control for various sources of bias like age  
236 or co-morbidities—are likely uninformative. Besides the prevalence ratio, we found that the prevalence of  
237 co-infection was also an unreliable measure of interaction, as low prevalences could be consistent with strong,  
238 positive interactions (Fig. 2, bottom panel). As suggested by our global sensitivity analysis, these deficiencies  
239 may be even more severe for SARS-CoV-2 infection, characterized by a relatively long latent period and a  
240 high reproduction number [28]. In sum, we submit that further epidemiological studies will be needed to  
241 elucidate the interactions of SARS-CoV-2 with other respiratory viruses.

242 More generally, our study adds to the growing body of evidence demonstrating the shortcomings of seem-  
243 ingly intuitive measures of interaction. Using the same model, Shrestha *et al.* demonstrated the unreliability  
244 of phase as an indicator of interaction [15]. Using a SIS-like model of multiple pathogens causing chronic  
245 infection, Hamelin *et al.* showed that the prevalence ratio (as defined in this study) exceeded unity for non-  
246 interacting pathogens [21]. In contrast, we found that the prevalence ratio equalled unity for non-interacting  
247 pathogens (Fig. 3). This discrepancy, explained by the different pathogens and modeling assumptions con-  
248 sidered in [21], highlights the sensitivity of the prevalence ratio to the characteristics of infection. More  
249 generally, it suggests that our results cannot be extrapolated to pathogens not well described by the SIR-like  
250 model used here. Using a series of SIS and SIRS models, Man *et al.* examined the properties of the odds  
251 ratio, defined as the ratio of the odds of one type in the presence of the other type, relative to the odds of  
252 this type in the absence of the other type—a quantity closely related to the alternative prevalence ratio  $PR'$   
253 defined above [20]. They proved that odds ratio exceeding unity could mask negative interactions. Despite  
254 differences in the scope of, and the models used in, this study, our results replicate this finding (Fig. 4). Fur-  
255 thermore, the association between the prevalence ratio and the interaction parameter in our study (Fig. 3)  
256 is comparable to that in [20] (Figure 2A, SIRS direct model). Finally, in a field study to assess interactions  
257 between an intestinal pathogen and nematodes in mice (where the true sign of interaction was known from  
258 previous experimental evidence), Fenton *et al.* reported that statistical methods based on cross-sectional data  
259 performed poorly and typically estimated the wrong sign of interaction [41]. Our results align with these  
260 findings, and we second Fenton *et al.*'s caution against the use of such methods to study pathogen-pathogen  
261 interactions. In sum, our study broadly agrees with previous evidence, and provides new evidence specific  
262 to the epidemiology of respiratory viruses.

263 The shortcomings of the prevalence ratio demonstrated here might suggest the need for new statistical

264 methods to estimate interaction from co-detection prevalence data. However, seconding Fenton *et al.* [41],  
265 we propose that methods based on longitudinal data—collected at an appropriately fine time scale—offer  
266 a more promising avenue of research. Among those methods, mathematical models of transmission provide  
267 a powerful tool to formulate and test biologically explicit mechanisms of interaction, while capturing the  
268 underlying, non-linear dynamics of infection of each pathogen [42]. Robust statistical inference techniques  
269 now facilitate fitting these models to epidemiological time series [43, 44], as demonstrated by earlier successful  
270 applications in the field of pathogen interactions [45, 46, 47, 48, 49, 50]. Alternatively, advanced regression  
271 models have been developed to assess interactions between respiratory viruses [51], but such models may be  
272 limited because they lack a mechanistic formulation of interaction. Altogether we propose that empirical or  
273 mechanistic models of longitudinal data will be required to study the interactions of SARS-CoV-2 with other  
274 respiratory viruses, and more generally the interactions between respiratory pathogens [52].

275 Our study has four important limitations. First, because we used a deterministic model expressed in pro-  
276 portions, we sidestepped the important issue of statistical uncertainty, caused for example by finite sample  
277 size or imperfect measurement of infection prevalences. As the prevalence ratio was found to systematically  
278 under-estimate the strength of interaction, such uncertainty—inevitable in practice—may further limit the  
279 ability of the prevalence ratio to correctly identify interactions. Second, for simplicity we did not include  
280 confounding variables (*e.g.*, age) that may also affect estimation of the prevalence ratio. Third, we consid-  
281 ered only short-term interactions that rapidly waned after clearance of infection. Although such interactions  
282 appear to be the most biologically plausible for different species of respiratory viruses [7, 8], long-term in-  
283 teractions resulting from adaptive cross-immunity have been documented and could be relevant to other  
284 systems, such as the multiple types or subtypes of influenza [53, 54]. Fourth, for simplicity we only modeled  
285 interactions that affected susceptibility to infection, because experimental evidence suggests this mechanism  
286 predominates among respiratory viruses [7, 8]. However, other mechanisms—like changes in the transmissi-  
287 bility or the duration of infection—are biologically likely and could be tested for other classes of pathogens.  
288 Acknowledging all these limitations, our simple model could serve as a building block for further research on  
289 epidemiological interactions.

290 In conclusion, our results show that the inherently complex, non-linear dynamic of respiratory viruses  
291 makes the interpretation of seemingly intuitive measures of interaction difficult, if not impossible. Despite  
292 these pitfalls, other statistical or mathematical methods based on longitudinal data should enable epidemi-  
293 ological research on pathogen interactions. Indeed, with increasing evidence that SARS-CoV-2 and other  
294 pathogens do not circulate in isolation but within polymicrobial systems, such research should remain a  
295 priority.

## 296 References

- 297 [1] GBD 2016 Lower Respiratory Infections Collaborators. Estimates of the global, regional, and national  
298 morbidity, mortality, and aetiologies of lower respiratory infections in 195 countries, 1990-2016: a system-  
299 atic analysis for the Global Burden of Disease Study 2016. *Lancet Infect Dis.* 2018 11;18(11):1191–1210.
- 300 [2] WHO Research and Development Blueprint. 2018 Annual review of diseases prioritized under the  
301 Research and Development Blueprint. World Health Organization; 2018. Available from: <https://s.gwdg.de/fUFmo0>.  
302
- 303 [3] Griffiths EC, Pedersen AB, Fenton A, Petchey OL. The nature and consequences of coinfection in  
304 humans. *J Infect.* 2011 Sep;63(3):200–6.
- 305 [4] DaPalma T, Doonan BP, Trager NM, Kasman LM. A systematic approach to virus-virus interactions.  
306 *Virus Res.* 2010 Apr;149(1):1–9.
- 307 [5] Bai L, Zhao Y, Dong J, Liang S, Guo M, Liu X, et al. Coinfection with influenza A virus enhances  
308 SARS-CoV-2 infectivity. *Cell Res.* 2021 04;31(4):395–403.
- 309 [6] Goto H, Ihira H, Morishita K, Tsuchiya M, Ohta K, Yumine N, et al. Enhanced growth of in-  
310 fluenza A virus by coinfection with human parainfluenza virus type 2. *Med Microbiol Immunol.* 2016  
311 Jun;205(3):209–18.
- 312 [7] Chan KF, Carolan LA, Korenkov D, Druce J, McCaw J, Reading PC, et al. Investigating Viral Interfer-  
313 ence Between Influenza A Virus and Human Respiratory Syncytial Virus in a Ferret Model of Infection.  
314 *J Infect Dis.* 2018 07;218(3):406–417.
- 315 [8] Dee K, Goldfarb DM, Haney J, Amat JAR, Herder V, Stewart M, et al. Human rhinovirus infection  
316 blocks SARS-CoV-2 replication within the respiratory epithelium: implications for COVID-19 epidemi-  
317 ology. *J Infect Dis.* 2021 Mar;.
- 318 [9] Smith JC, Sausville EL, Girish V, Yuan ML, Vasudevan A, John KM, et al. Cigarette Smoke Expo-  
319 sure and Inflammatory Signaling Increase the Expression of the SARS-CoV-2 Receptor ACE2 in the  
320 Respiratory Tract. *Dev Cell.* 2020 06;53(5):514–529.e3.
- 321 [10] Ziegler CGK, Allon SJ, Nyquist SK, Mbano IM, Miao VN, Tzouanas CN, et al. SARS-CoV-2 Receptor  
322 ACE2 Is an Interferon-Stimulated Gene in Human Airway Epithelial Cells and Is Detected in Specific  
323 Cell Subsets across Tissues. *Cell.* 2020 05;181(5):1016–1035.e19.

- 324 [11] Thindwa D, Garcia Quesada M, Liu Y, Bennett J, Cohen C, Knoll MD, et al. Use of seasonal influenza  
325 and pneumococcal polysaccharide vaccines in older adults to reduce COVID-19 mortality. *Vaccine*. 2020  
326 07;38(34):5398–5401.
- 327 [12] Brogden KA, Guthmiller JM, Taylor CE. Human polymicrobial infections. *Lancet*. 2005;365(9455):253–  
328 5.
- 329 [13] Shann F. The non-specific effects of vaccines. *Arch Dis Child*. 2010 Sep;95(9):662–7.
- 330 [14] Cowling BJ, Fang VJ, Nishiura H, Chan KH, Ng S, Ip DKM, et al. Increased risk of noninfluenza  
331 respiratory virus infections associated with receipt of inactivated influenza vaccine. *Clin Infect Dis*.  
332 2012 Jun;54(12):1778–83.
- 333 [15] Shrestha S, King AA, Rohani P. Statistical inference for multi-pathogen systems. *PLoS Comput Biol*.  
334 2011 Aug;7(8):e1002135.
- 335 [16] Vandembroucke JP, Pearce N. Test-Negative Designs: Differences and Commonalities with Other Case-  
336 Control Studies with "Other Patient" Controls. *Epidemiology*. 2019 11;30(6):838–844.
- 337 [17] Stowe J, Tessier E, Zhao H, Guy R, Muller-Pebody B, Zambon M, et al. Interactions between SARS-  
338 CoV-2 and influenza, and the impact of coinfection on disease severity: a test-negative design. *Int J*  
339 *Epidemiol*. 2021 May;.
- 340 [18] Kim D, Quinn J, Pinsky B, Shah NH, Brown I. Rates of Co-infection Between SARS-CoV-2 and Other  
341 Respiratory Pathogens. *JAMA*. 2020 May;323(20):2085–2086.
- 342 [19] Nowak MD, Sordillo EM, Gitman MR, Paniz Mondolfi AE. Coinfection in SARS-CoV-2 infected pa-  
343 tients: Where are influenza virus and rhinovirus/enterovirus? *J Med Virol*. 2020 10;92(10):1699–1700.
- 344 [20] Man I, Wallinga J, Bogaards JA. Inferring Pathogen Type Interactions Using Cross-sectional Prevalence  
345 Data: Opportunities and Pitfalls for Predicting Type Replacement. *Epidemiology*. 2018 09;29(5):666–  
346 674.
- 347 [21] Hamelin FM, Allen LJS, Bokil VA, Gross LJ, Hilker FM, Jeger MJ, et al. Coinfections by noninteracting  
348 pathogens are not independent and require new tests of interaction. *PLoS Biol*. 2019 12;17(12):e3000551.
- 349 [22] Lloyd AL. Destabilization of epidemic models with the inclusion of realistic distributions of infectious  
350 periods. *Proc Biol Sci*. 2001 May;268(1470):985–93.
- 351 [23] Keeling MJ, Rohani P. Modeling infectious diseases in humans and animals. Princeton: Princeton  
352 University Press; 2008. Available from: <http://www.loc.gov/catdir/toc/fy0805/2006939548.html>.

- 353 [24] Chowell G, Miller MA, Viboud C. Seasonal influenza in the United States, France, and Australia:  
354 transmission and prospects for control. *Epidemiol Infect.* 2008 Jun;136(6):852–64.
- 355 [25] Carrat F, Vergu E, Ferguson NM, Lemaître M, Cauchemez S, Leach S, et al. Time lines of infec-  
356 tion and disease in human influenza: a review of volunteer challenge studies. *Am J Epidemiol.* 2008  
357 Apr;167(7):775–85.
- 358 [26] Vink MA, Bootsma MCJ, Wallinga J. Serial intervals of respiratory infectious diseases: a systematic  
359 review and analysis. *Am J Epidemiol.* 2014 Nov;180(9):865–75.
- 360 [27] Bi Q, Wu Y, Mei S, Ye C, Zou X, Zhang Z, et al. Epidemiology and transmission of COVID-19 in 391  
361 cases and 1286 of their close contacts in Shenzhen, China: a retrospective cohort study. *Lancet Infect  
362 Dis.* 2020 08;20(8):911–919.
- 363 [28] Li R, Pei S, Chen B, Song Y, Zhang T, Yang W, et al. Substantial undocumented infection facilitates  
364 the rapid dissemination of novel coronavirus (SARS-CoV-2). *Science.* 2020;368(6490):489–493.
- 365 [29] Flaxman S, Mishra S, Gandy A, Unwin HJT, Mellan TA, Coupland H, et al. Estimating the effects of  
366 non-pharmaceutical interventions on COVID-19 in Europe. *Nature.* 2020 08;584(7820):257–261.
- 367 [30] Kucharski AJ, Russell TW, Diamond C, Liu Y, Edmunds J, Funk S, et al. Early dynamics of transmission  
368 and control of COVID-19: a mathematical modelling study. *Lancet Infect Dis.* 2020 05;20(5):553–558.
- 369 [31] Melidou A, Pereyaslov D, Hungnes O, Prosenč K, Alm E, Adlhoch C, et al. Virological surveillance of  
370 influenza viruses in the WHO European Region in 2019/20 - impact of the COVID-19 pandemic. *Euro  
371 Surveill.* 2020 11;25(46).
- 372 [32] Wu J, Dhingra R, Gambhir M, Remais JV. Sensitivity analysis of infectious disease models: methods,  
373 advances and their application. *J R Soc Interface.* 2013 Sep;10(86):20121018.
- 374 [33] Spencer JA, Shutt DP, Moser SK, Clegg H, Wearing HJ, Mukundan H, et al. Distinguishing Viruses  
375 Responsible for Influenza-Like Illness. *medRxiv.* 2021;p. 2020–02.
- 376 [34] Wood SN. *Generalized additive models: an introduction with R.* 2nd ed. CRC press; 2017.
- 377 [35] Aaron A King and Edward L Ionides and Carles Martinez Bretó and Stephen P Ellner and Matthew  
378 J Ferrari and Bruce E Kendall and Michael Lavine and Dao Nguyen and Daniel C Reuman and Helen  
379 Wearing and Simon N Wood. *pomp: Statistical Inference for Partially Observed Markov Processes;*  
380 2020. R package, version 2.7. Available from: <https://kingaa.github.io/pomp/>.

- 381 [36] R Core Team. R: A Language and Environment for Statistical Computing. Vienna, Austria; 2020.  
382 <https://www.R-project.org/>. Available from: <https://www.R-project.org/>.
- 383 [37] Daniel Lüdtke. ggeffects: Tidy Data Frames of Marginal Effects from Regression Models. Journal of  
384 Open Source Software. 2018;3(26):772.
- 385 [38] Kevin Ushey. renv: Project Environments; 2021. R package version 0.12.5. Available from: <https://CRAN.R-project.org/package=renv>.  
386
- 387 [39] Lansbury L, Lim B, Baskaran V, Lim WS. Co-infections in people with COVID-19: a systematic review  
388 and meta-analysis. J Infect. 2020 08;81(2):266–275.
- 389 [40] Musuuza JS, Watson L, Parmasad V, Putman-Buehler N, Christensen L, Safdar N. Prevalence and  
390 outcomes of co-infection and superinfection with SARS-CoV-2 and other pathogens: A systematic  
391 review and meta-analysis. PLoS One. 2021;16(5):e0251170.
- 392 [41] Fenton A, Knowles SCL, Petchey OL, Pedersen AB. The reliability of observational approaches for  
393 detecting interspecific parasite interactions: comparison with experimental results. Int J Parasitol. 2014  
394 Jun;44(7):437–45.
- 395 [42] Metcalf CJE, Walter KS, Wesolowski A, Buckee CO, Shevliakova E, Tatem AJ, et al. Identifying  
396 climate drivers of infectious disease dynamics: recent advances and challenges ahead. Proc Biol Sci.  
397 2017 Aug;284(1860).
- 398 [43] Ionides EL, Nguyen D, Atchadé Y, Stoev S, King AA. Inference for dynamic and latent variable models  
399 via iterated, perturbed Bayes maps. Proc Natl Acad Sci U S A. 2015 Jan;112(3):719–24.
- 400 [44] King AA, Nguyen D, Ionides EL. Statistical Inference for Partially Observed Markov Processes via the  
401 R Package pomp. Journal of Statistical Software. 2016;69(1):1–43.
- 402 [45] Shrestha S, Foxman B, Weinberger DM, Steiner C, Viboud C, Rohani P. Identifying the interac-  
403 tion between influenza and pneumococcal pneumonia using incidence data. Sci Transl Med. 2013  
404 Jun;5(191):191ra84.
- 405 [46] Opatowski L, Varon E, Dupont C, Temime L, van der Werf S, Gutmann L, et al. Assessing pneumococcal  
406 meningitis association with viral respiratory infections and antibiotics: insights from statistical and  
407 mathematical models. Proc Biol Sci. 2013 Aug;280(1764):20130519.

- 408 [47] Reich NG, Shrestha S, King AA, Rohani P, Lessler J, Kalayanarooj S, et al. Interactions between  
409 serotypes of dengue highlight epidemiological impact of cross-immunity. *J R Soc Interface*. 2013  
410 Sep;10(86):20130414.
- 411 [48] Shrestha S, Foxman B, Berus J, van Panhuis WG, Steiner C, Viboud C, et al. The role of influenza in  
412 the epidemiology of pneumonia. *Sci Rep*. 2015 Oct;5:15314.
- 413 [49] Domenech de Cellès M, Arduin H, Lévy-Bruhl D, Georges S, Souty C, Guillemot D, et al. Unraveling  
414 the seasonal epidemiology of pneumococcus. *Proc Natl Acad Sci U S A*. 2019 01;116(5):1802–1807.
- 415 [50] Noori N, Rohani P. Quantifying the consequences of measles-induced immune modulation for whooping  
416 cough epidemiology. *Philos Trans R Soc Lond B Biol Sci*. 2019 06;374(1775):20180270.
- 417 [51] Nickbakhsh S, Mair C, Matthews L, Reeve R, Johnson PCD, Thorburn F, et al. Virus-virus interactions  
418 impact the population dynamics of influenza and the common cold. *Proc Natl Acad Sci U S A*. 2019  
419 Dec;.
- 420 [52] Opatowski L, Baguelin M, Eggo RM. Influenza interaction with cocirculating pathogens and its impact  
421 on surveillance, pathogenesis, and epidemic profile: A key role for mathematical modelling. *PLoS*  
422 *Pathog*. 2018 02;14(2):e1006770.
- 423 [53] Terajima M, Babon JAB, Ennis FA, et al. Cross-reactive human B cell and T cell epitopes between  
424 influenza A and B viruses. *Virology journal*. 2013;10(1):1–10.
- 425 [54] Laurie KL, Guarnaccia TA, Carolan LA, Yan AWC, Aban M, Petrie S, et al. Interval Between Infections  
426 and Viral Hierarchy Are Determinants of Viral Interference Following Influenza Virus Infection in a  
427 Ferret Model. *J Infect Dis*. 2015 Dec;212(11):1701–10.



## 428 **Declarations**

### 429 **Availability of data and materials**

430 All R programming codes can be found at <https://transfer.mpiib-berlin.mpg.de/s/mKpySLNBcZoQt8D>.

### 431 **Competing interests**

432 Competing interests MDdC received postdoctoral funding (2017–2019) from Pfizer and consulting fees from  
433 GSK. All other authors declare no competing interests.

### 434 **Funding**

435 No specific funding was used for this study.

### 436 **Authors Contributions**

437 MDdC conceived of the study design and performed the analysis. EG, JSC, SK conducted bibliographical  
438 research and provided content expertise. All authors helped draft, and approved the final version of, the  
439 manuscript.

### 440 **Acknowledgements**

441 We thank Laura Barrero and Michael Briga for helpful comments on the manuscript.

### 442 **List of abbreviations**

- 443 • COVID-19: coronavirus disease 2019
- 444 • SARS-CoV-2: severe acute respiratory syndrome coronavirus 2
- 445 • RSV: respiratory syncytial virus

### 446 **List of supplementary materials**

- 447 • Figures S1–S2

448 **Figures and tables**

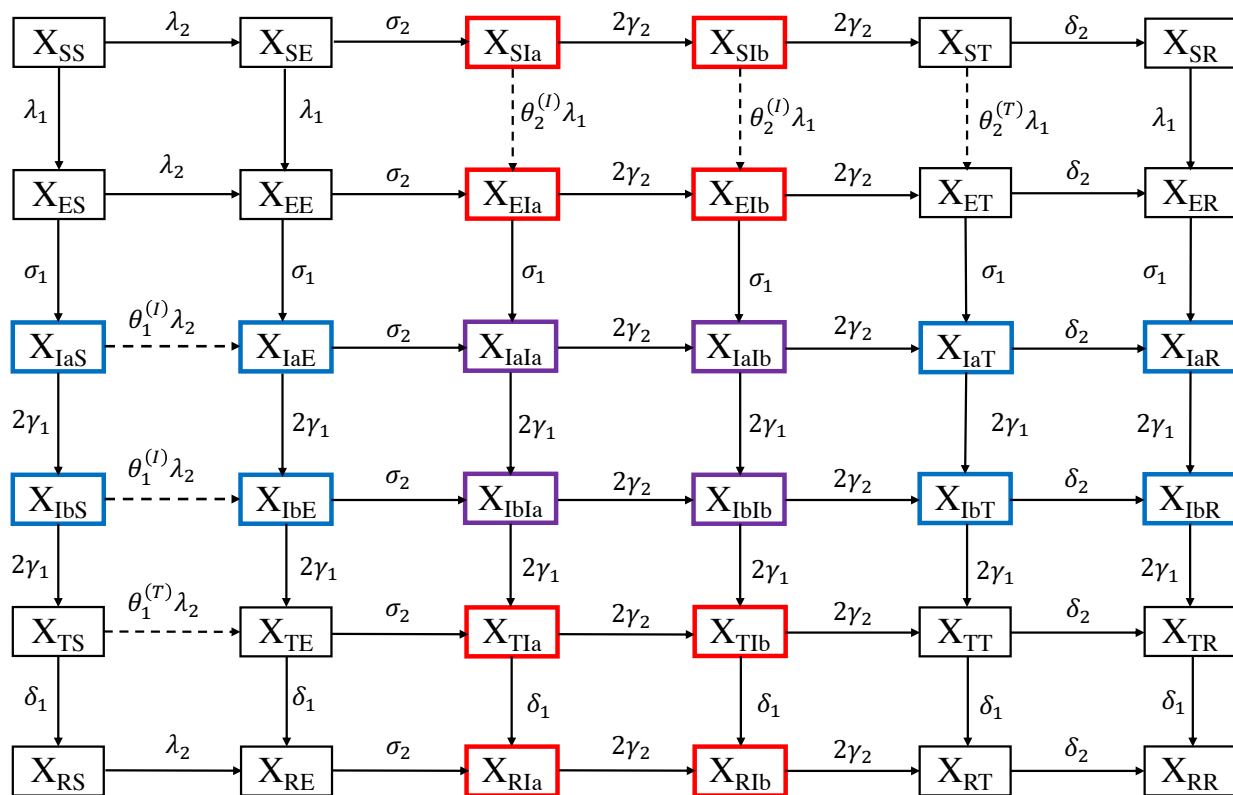

Figure 1: **Schematic of epidemiological model of viral co-circulation.** Individuals infectious with virus 1 are highlighted in blue, with virus 2 in red, and with both viruses in purple. Dashed lines indicate epidemiological transitions affected by interactions.

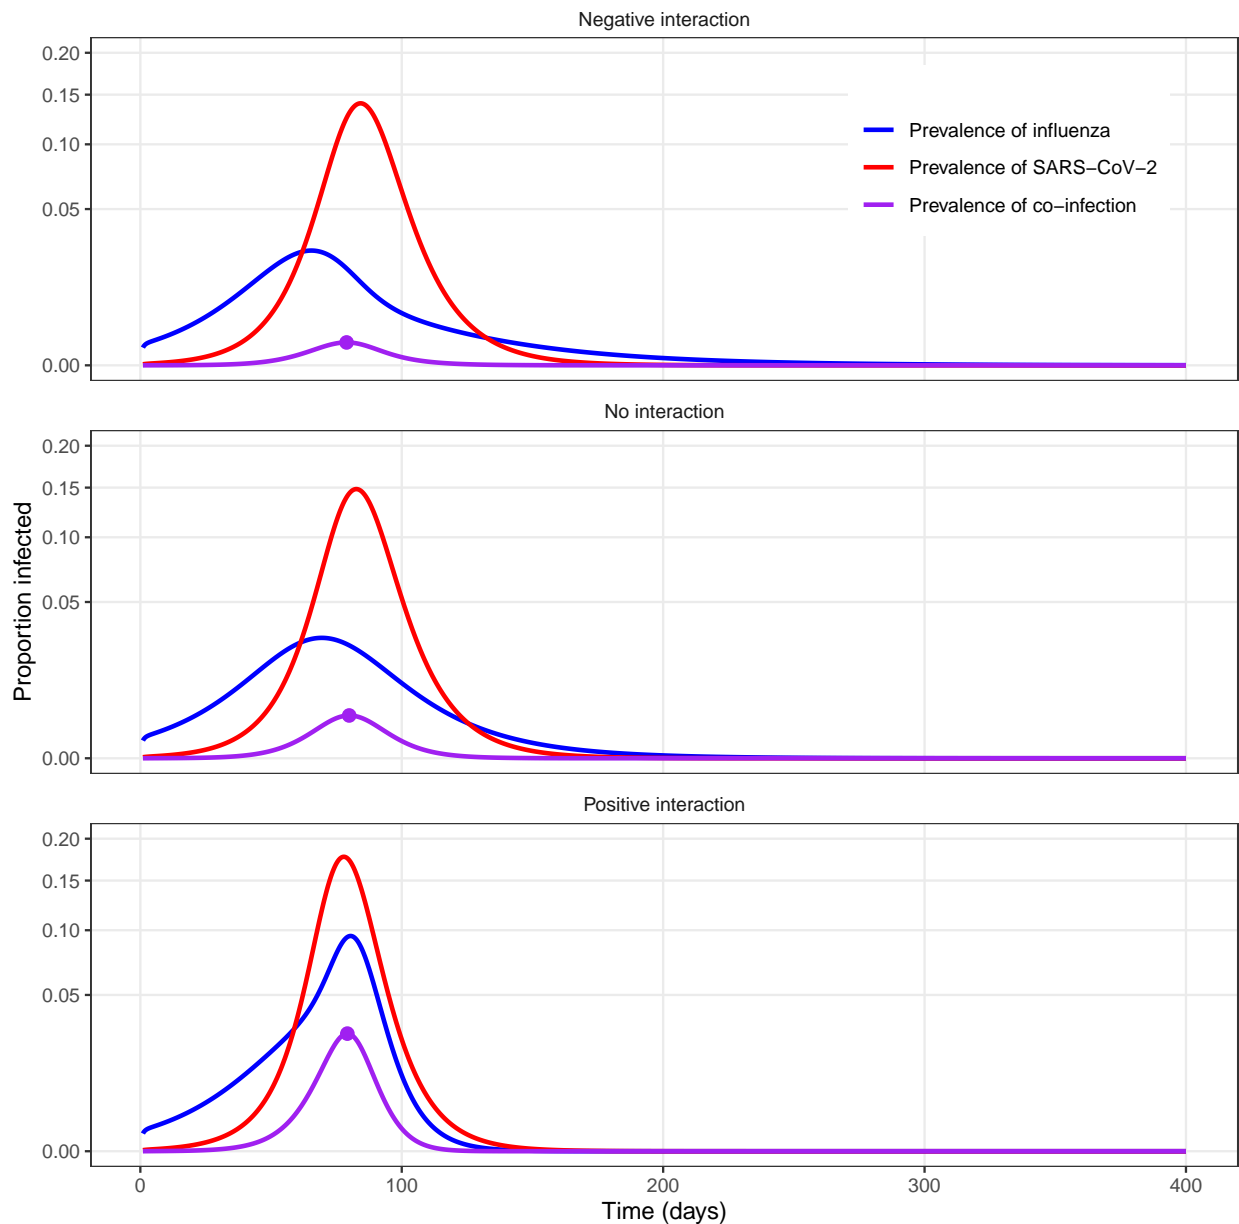

Figure 2: **Example model simulations for different types of uniform interactions between influenza and SARS-CoV-2.** The simulations depicted correspond to uniform interactions ( $\theta = \theta_1^{(I)} = \theta_1^{(T)} = \theta_2^{(T)} = \theta_2^{(I)}$ ), either negative ( $\theta = 0$ , upper panel), neutral ( $\theta = 1$ , middle panel), or positive ( $\theta = 5$ , lower panel). Here the average post-infectious period was fixed to  $\frac{1}{\delta} = \frac{1}{\delta_1} = \frac{1}{\delta_2} = 1$  day; other parameters were fixed to model the coupled dynamics of influenza and SARS-CoV-2 (cf. Table 1). The purple points indicate the peak of co-infection prevalence, when the prevalence ratio was calculated (numerical values of the prevalence ratio: 0.45, 1.00, and 1.72 from top to bottom). In every panel, the  $y$ -axis values are square-root transformed to highlight the peaks.

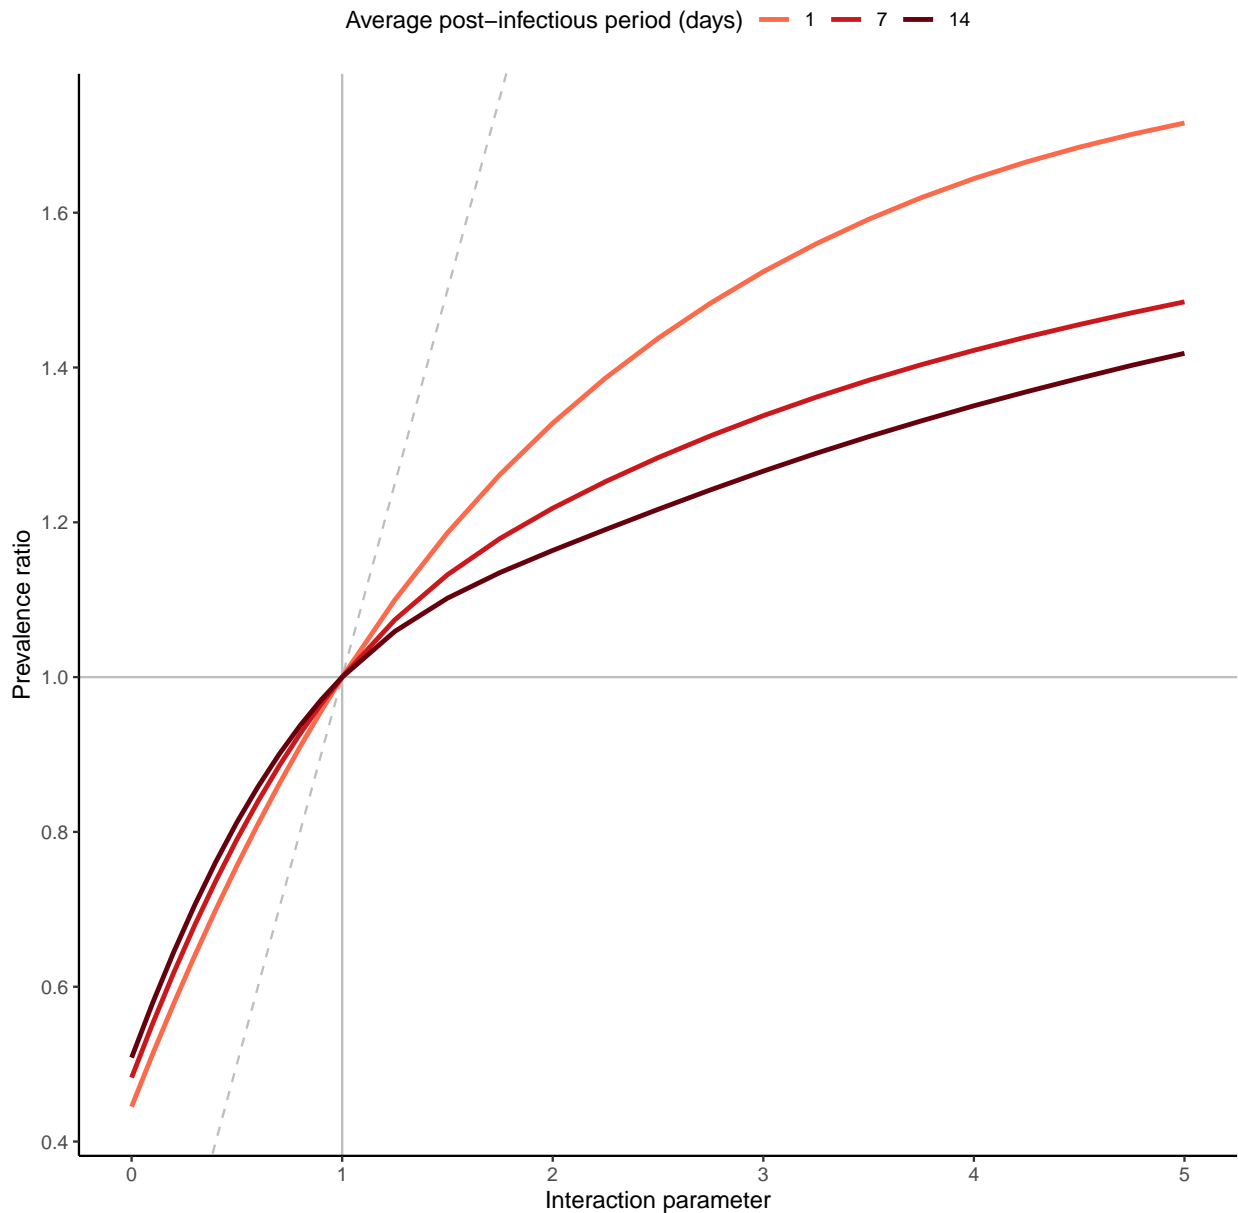

Figure 3: **Relationship between strength of interaction and prevalence ratio for uniform interactions between influenza and SARS-CoV-2.** The scenarios tested correspond to  $\theta_1^{(I)} = \theta_1^{(T)} = \theta_2^{(T)} = \theta_2^{(I)}$  ( $x$ -axis), for three different values of the average post-infectious period ( $\frac{1}{\delta} = \frac{1}{\delta_1} = \frac{1}{\delta_2}$ ); other parameters were fixed to model the coupled dynamics of influenza and SARS-CoV-2 (cf. Table 1). The dashed grey identity line depicts equality between the prevalence ratio and the true strength of interaction.

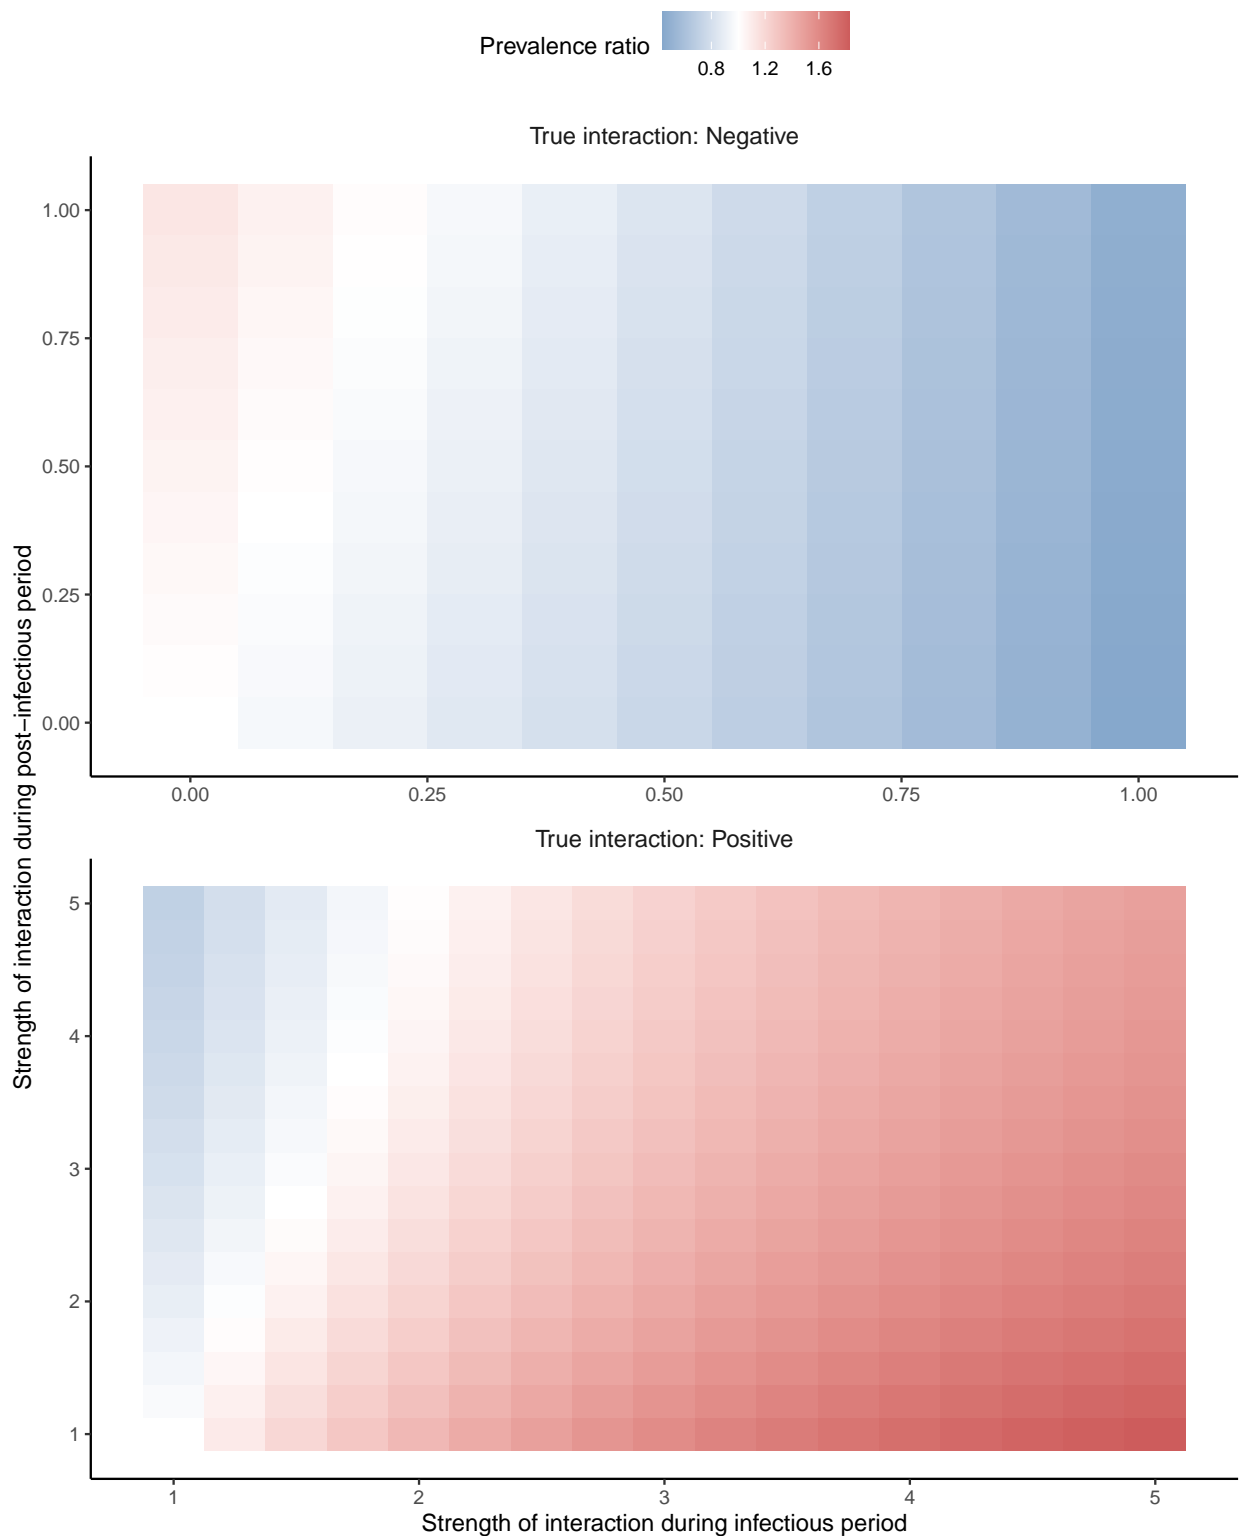

Figure 4: **Relationship between strength of interaction and prevalence ratio for non-uniform interactions between influenza and SARS-CoV-2.** The scenarios tested correspond to  $\theta_1^{(I)} = \theta_2^{(I)} = \theta^{(I)}$  and  $\theta_1^{(T)} = \theta_2^{(T)} = \theta^{(T)}$ ; other parameters were fixed to model the coupled dynamics of influenza and SARS-CoV-2 (cf. Table 1). For negative interactions (top panel), the  $x$ -axis represents  $1 - \theta^{(I)}$  and the  $y$ -axis  $1 - \theta^{(T)}$ ; for positive interactions (bottom panel)  $\theta^{(I)}$  and  $\theta^{(T)}$ . Hence, in either panel the true strength of interaction increases from left to right and from bottom to top.

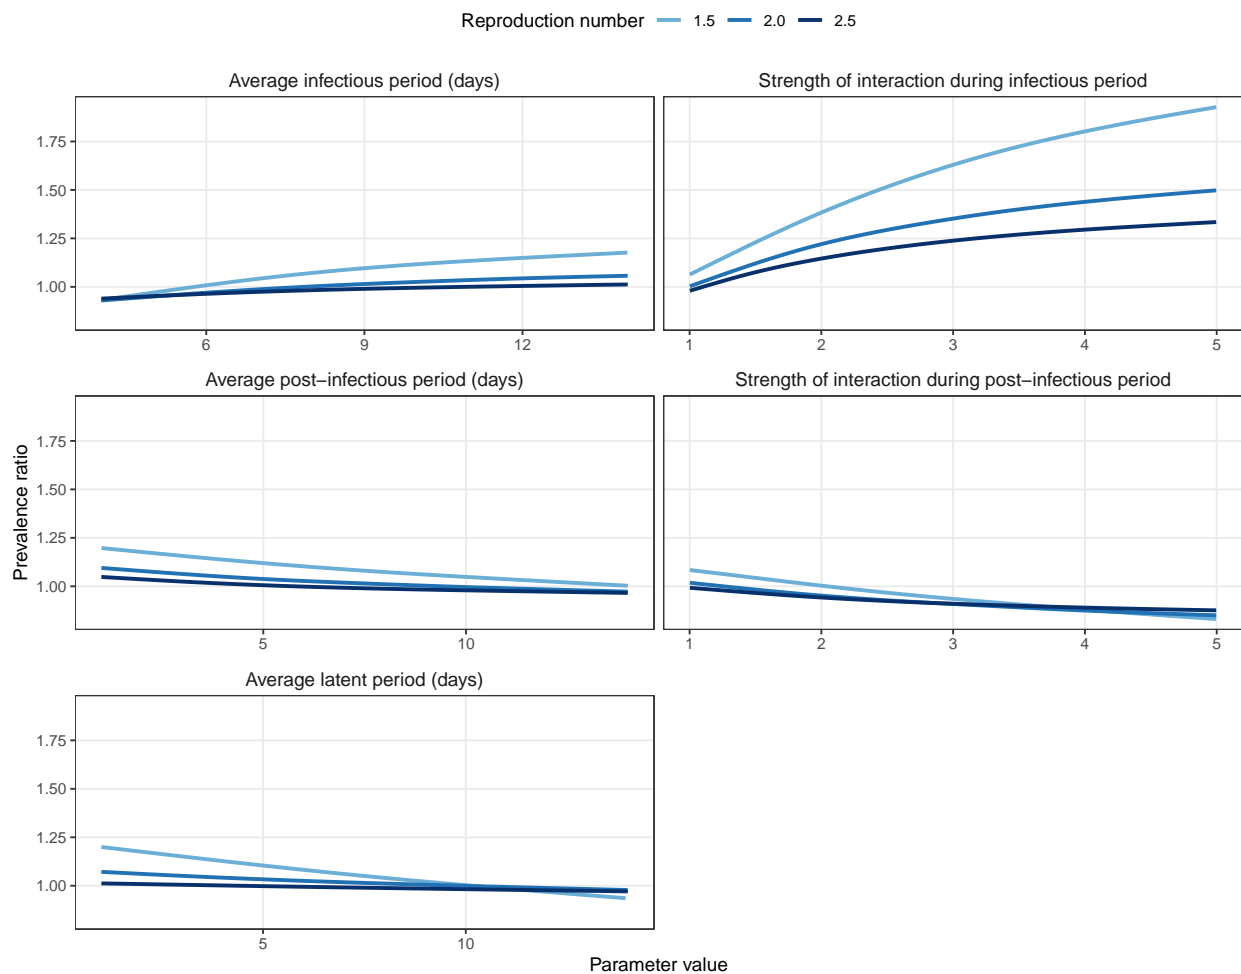

Figure 5: **Global sensitivity analysis for positive virus-virus interactions.** The association between the prevalence ratio and each input parameter was estimated using a GAM with cubic splines (sample size  $n = 10^3$ ), for three different values of the reproduction number (1.5, 2.0, and 2.5). The corresponding adjusted R-squared equalled 96.3%, 96.6%, and 98.4%. For visual clarity, the  $x$ -axis values differ between panels.

| Parameter                                        | Meaning                                               | Fixed value or interval (influenza–SARS-CoV-2 analysis) | Fixed value or interval (global sensitivity analysis)                          | Source/Comment                                          |
|--------------------------------------------------|-------------------------------------------------------|---------------------------------------------------------|--------------------------------------------------------------------------------|---------------------------------------------------------|
| $\sigma_1^{-1}$                                  | Average latent period of influenza                    | 1 day                                                   | $\sigma_1^{-1} = \sigma_2^{-1} = \sigma^{-1}$<br>$\sigma^{-1} \in [1,14]$ days | [26]                                                    |
| $\sigma_2^{-1}$                                  | Average latent period of SARS-CoV-2                   | 4 days                                                  |                                                                                | [29]                                                    |
| $\gamma_1^{-1}$                                  | Average infectious period of influenza                | 4 days                                                  | $\gamma_1^{-1} = \gamma_2^{-1} = \gamma^{-1}$<br>$\gamma^{-1} \in [4,14]$ days | [27]                                                    |
| $\gamma_2^{-1}$                                  | Average infectious period of SARS-CoV-2               | 5 days                                                  |                                                                                | [28]                                                    |
| $R_1$                                            | Reproduction number of influenza                      | 1.3                                                     | $R_1 = R_2 = R$<br>$R \in \{1.5, 2.0, 2.5\}$                                   | [25]                                                    |
| $R_2$                                            | Reproduction number of SARS-CoV-2                     | 2.5                                                     |                                                                                | [29, 31]                                                |
| $E_{0,1}$                                        | Initial fraction exposed to influenza                 | $10^{-3}$                                               | $E_{0,1} = E_{0,2} = 10^{-5}$                                                  | Assumption: Influenza circulated before SARS-CoV-2 [32] |
| $E_{0,2}$                                        | Initial fraction exposed to SARS-CoV-2                | $10^{-5}$                                               |                                                                                |                                                         |
| $\delta^{-1} = \delta_1^{-1} = \delta_2^{-1}$    | Average post-infectious period                        | 1–14 days                                               | 1–14 days                                                                      | [34]                                                    |
| $\theta^{(I)} = \theta_1^{(I)} = \theta_2^{(I)}$ | Strength of interaction during infectious period      | 0–5                                                     | 1–5                                                                            | Assumption                                              |
| $\theta^{(T)} = \theta_1^{(T)} = \theta_2^{(T)}$ | Strength of interaction during post-infectious period | 0–5                                                     | 1–5                                                                            | Assumption                                              |

Table 1: List of model parameters.





## 449 Supplementary Materials

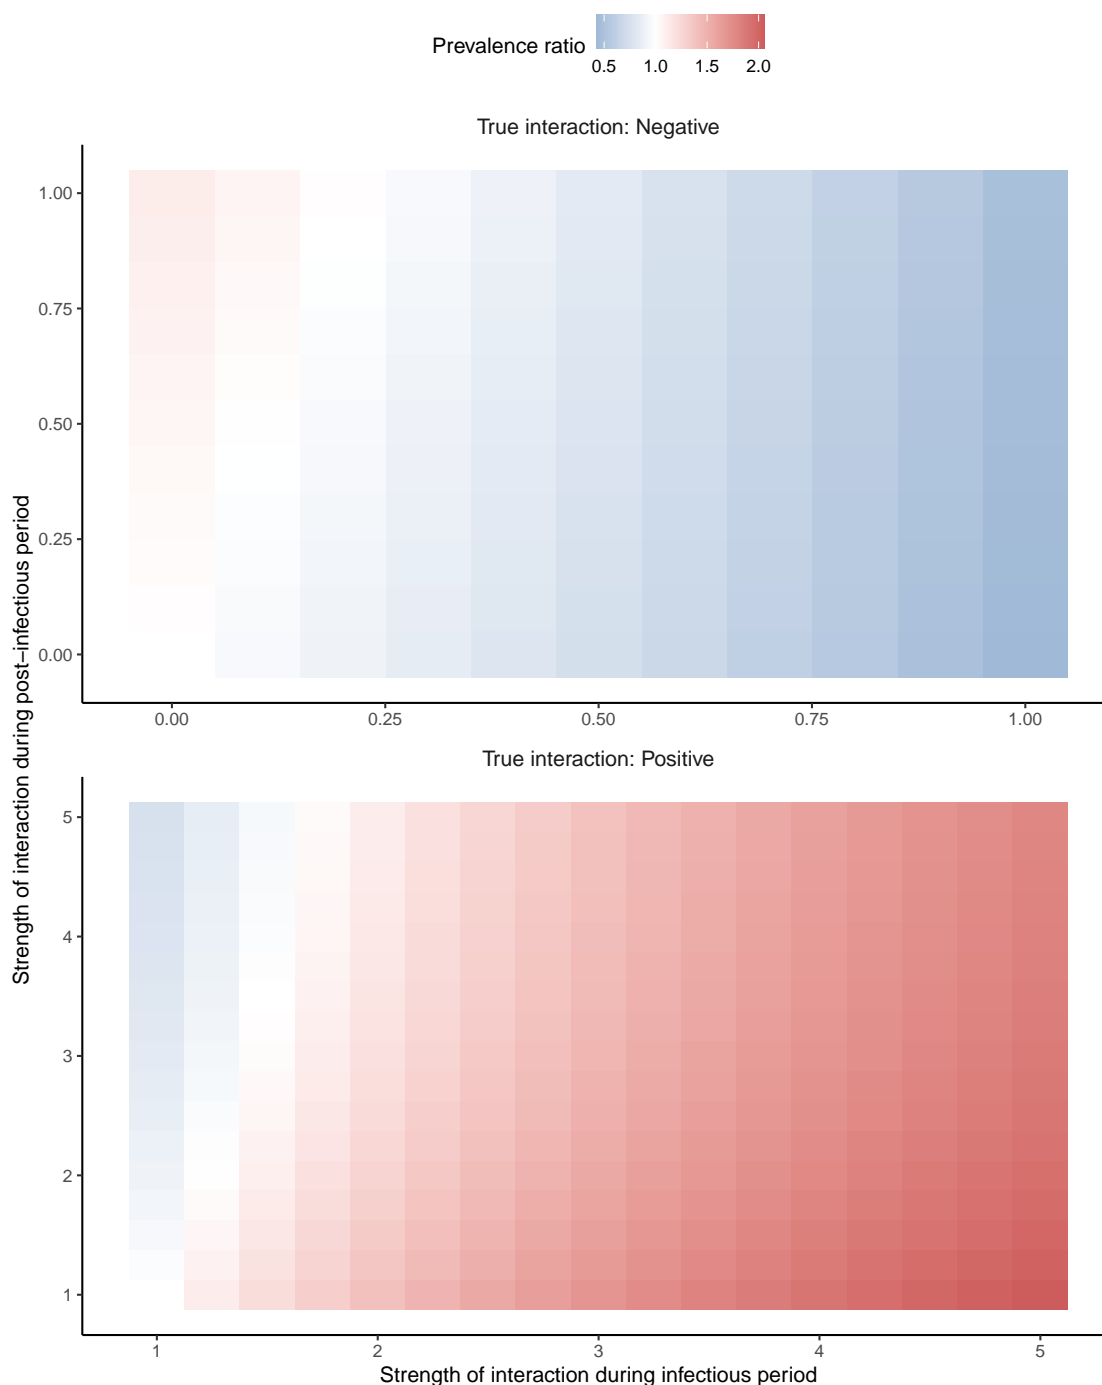

Figure S1: **Relationship between strength of interaction and prevalence ratio for non-uniform interactions between influenza and SARS-CoV-2 (prevalence ratio time-averaged  $\pm 14$  days around the peak time of co-infection).** The scenarios tested correspond to  $\theta_1^{(I)} = \theta_2^{(I)} = \theta^{(I)}$  and  $\theta_1^{(T)} = \theta_2^{(T)} = \theta^{(T)}$ ; other parameters were fixed to model the coupled dynamics of influenza and SARS-CoV-2 (cf. Table 1). For negative interactions (top panel), the  $x$ -axis represents  $1 - \theta^{(I)}$  and the  $y$ -axis  $1 - \theta^{(T)}$ ; for positive interactions (bottom panel)  $\theta^{(I)}$  and  $\theta^{(T)}$ . Hence, in either panel the true strength of interaction increases from left to right and from bottom to top.

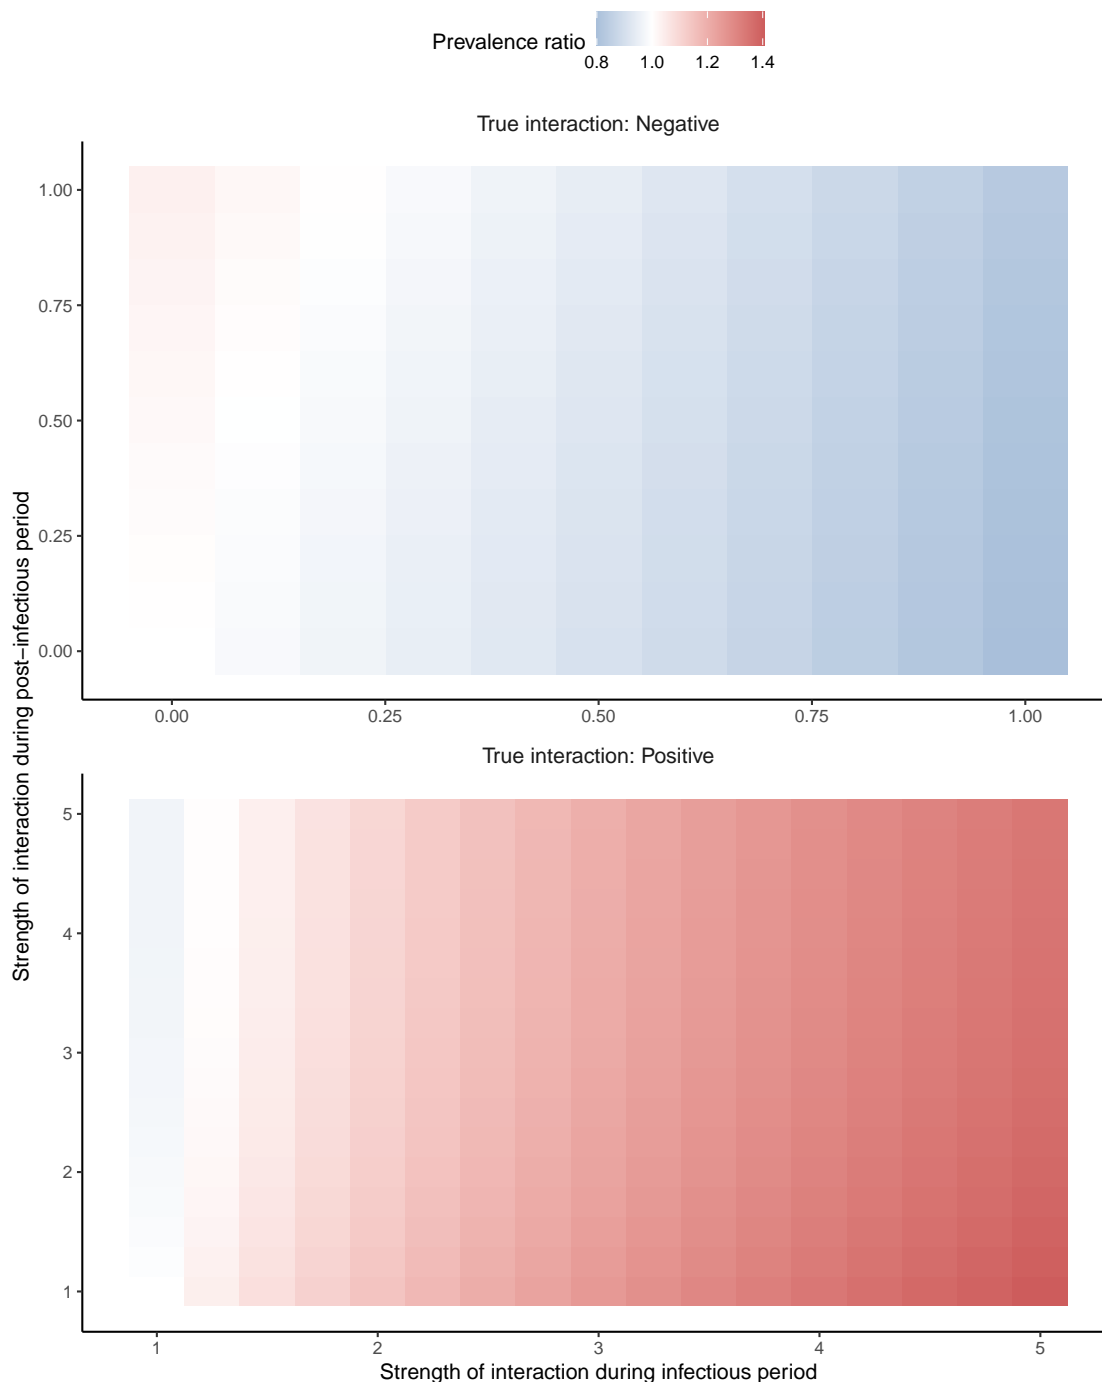

Figure S2: **Relationship between strength of interaction and prevalence ratio for non-symmetric, non-uniform interactions between influenza and SARS-CoV-2.** The scenarios tested correspond to  $\theta_1^{(I)} = \theta^{(I)}, \theta_2^{(I)} = 1$  and  $\theta_1^{(T)} = \theta^{(T)}, \theta_2^{(T)} = 1$  (that is, no effect of SARS-CoV-2 on influenza); other parameters were fixed to model the coupled dynamics of influenza and SARS-CoV-2 (cf. Table 1). For negative interactions (top panel), the  $x$ -axis represents  $1 - \theta_1^{(I)}$  and the  $y$ -axis  $1 - \theta_1^{(T)}$ ; for positive interactions (bottom panel)  $\theta_1^{(I)}$  and  $\theta_1^{(T)}$ . Hence, in either panel the true strength of interaction increases from left to right and from bottom to top.
